# Supplementary material for: Spectroscopically labelled hydroxylamino-triazine (BHT) siderophores toward the quantification of iron(iii), vanadium(v) and uranium(vi) hard metal ions
Source: Royal Society of Chemistry journal article supplement (doi:10.1039/d4nj02645d), 2024-01-01
Supplement: d4nj02645d1.pdf [file d4nj02645d1.pdf]

**Spectroscopically labelled hydroxylamino-triazine (BHT) siderophores toward the quantification of iron(III), vanadium(V) and uranium(VI) hard metal ions**

Angelos Amoiridis,<sup>a</sup> Michael Papanikolaou,<sup>a</sup> Chryssoula Drouza,<sup>b</sup> Themistoklis A. Kabanos\*<sup>c</sup> and Anastasios D. Keramidas\*<sup>a</sup>

<sup>a</sup> *University of Cyprus, Department of Chemistry, 2109, Nicosia, Cyprus. Email: [akeramid@ucy.ac.cy](mailto:akeramid@ucy.ac.cy)*

<sup>b</sup> *Department of Agricultural Sciences, Biotechnology and Food Science, Cyprus University of Technology, Limassol 3036, Cyprus. E-mail: [chryssoula.drouza@cut.ac.cy](mailto:chryssoula.drouza@cut.ac.cy)*

<sup>c</sup> *Department of Chemistry, Section of Inorganic and Analytical Chemistry, University of Ioannina, 45110 Ioannina, Greece: E-mail: [tkampano@uoi.gr](mailto:tkampano@uoi.gr)*

| Contents                                                                                                                                                                                                                                                                                                                                                                                                                                                                                                                                                                                                                                                          | Pages     |
|-------------------------------------------------------------------------------------------------------------------------------------------------------------------------------------------------------------------------------------------------------------------------------------------------------------------------------------------------------------------------------------------------------------------------------------------------------------------------------------------------------------------------------------------------------------------------------------------------------------------------------------------------------------------|-----------|
| <b>Supporting Information</b>                                                                                                                                                                                                                                                                                                                                                                                                                                                                                                                                                                                                                                     | <b>S3</b> |
| <b>Figure S1.</b> Co-crystallization of complexes <b>2</b> and <b>3</b> under microscope. Complex <b>2</b> crystallizes as rod-like crystals while complex <b>3</b> as blocks.                                                                                                                                                                                                                                                                                                                                                                                                                                                                                    | S5        |
| <b>Figure S2.</b> Infra red spectra of dctc, H <sub>2</sub> cbht and <b>1-5</b> and assignments.                                                                                                                                                                                                                                                                                                                                                                                                                                                                                                                                                                  | S6        |
| <b>Figure S3.</b> Wireframe drawing of the crystal structure of <b>2</b> .                                                                                                                                                                                                                                                                                                                                                                                                                                                                                                                                                                                        | S6        |
| <b>Figure S4:</b> <sup>1</sup> H NMR spectrum of dctc in CDCl <sub>3</sub> , 500 MHz, 20°C.                                                                                                                                                                                                                                                                                                                                                                                                                                                                                                                                                                       | S7        |
| <b>Figure S5:</b> <sup>13</sup> C NMR spectrum of dctc in CDCl <sub>3</sub> , 126 MHz, 20°C.                                                                                                                                                                                                                                                                                                                                                                                                                                                                                                                                                                      | S8        |
| <b>Figure S6:</b> <sup>1</sup> H NMR spectrum of H <sub>2</sub> cbht in DMSO-d <sub>6</sub> , 500 MHz, 20°C.                                                                                                                                                                                                                                                                                                                                                                                                                                                                                                                                                      | S9        |
| <b>Figure S7:</b> <sup>13</sup> C NMR spectrum of H <sub>2</sub> cbht in DMSO-d <sub>6</sub> , 126 MHz, 20°C.                                                                                                                                                                                                                                                                                                                                                                                                                                                                                                                                                     | S10       |
| <b>Figure S8.</b> 2D { <sup>1</sup> H} grCOSY spectrum of the aromatic region of a dmsO-d <sub>6</sub> solution of a solution of <b>1</b> (x mM), H <sub>2</sub> cbht (x mM) and Et <sub>3</sub> N (x mM). (a=carbazole protons on cbht <sup>2-</sup> containing sp <sup>3</sup> N atoms, b=carbazole protons on cbht <sup>2-</sup> containing only sp <sup>2</sup> N atoms)                                                                                                                                                                                                                                                                                      | S11       |
| <b>Figure S9.</b> Excitation and emission spectrum of 1.00 mM M of H <sub>2</sub> cbht in dmsO.                                                                                                                                                                                                                                                                                                                                                                                                                                                                                                                                                                   | S12       |
| <b>Figure S10.</b> UV-vis spectra of 7.42 x 10 <sup>-5</sup> M of H <sub>2</sub> cbht and 27.7 x 10 <sup>-5</sup> M of Et <sub>3</sub> N in dmsO titrated by U <sup>VI</sup> O(NO <sub>3</sub> ) <sub>2</sub> in dmsO. In each spectrum, U <sup>VI</sup> O <sub>2</sub> <sup>2+</sup> is added in order the concentration of the metal ion to be increased by 1.58 x 10 <sup>-5</sup> M.                                                                                                                                                                                                                                                                          | S13       |
| <b>Figure S11.</b> UV-vis spectra of 7.42 x 10 <sup>-5</sup> M of H <sub>2</sub> cbht and 27.7 x 10 <sup>-5</sup> M of Et <sub>3</sub> N in dmsO titrated by NaV <sup>VO</sup> <sub>3</sub> in H <sub>2</sub> O. In each spectrum, V <sup>VO</sup> O <sub>4</sub> <sup>3-</sup> is added in order the concentration of the metal ion to be increased by 1.58 x 10 <sup>-5</sup> M.                                                                                                                                                                                                                                                                                | S14       |
| <b>Figure S12.</b> UV-vis spectra of 7.42 x 10 <sup>-5</sup> M of H <sub>2</sub> cbht and 27.7 x 10 <sup>-5</sup> M of Et <sub>3</sub> N in dmsO titrated by Fe <sup>III</sup> (NO <sub>3</sub> ) <sub>3</sub> in dmsO. In each spectrum, Fe <sup>III</sup> is added in order the concentration of the metal ion to be increased by 1.58 x 10 <sup>-5</sup> M.                                                                                                                                                                                                                                                                                                    | S15       |
| <b>Figure S13.</b> Plot of the energy of the LMCT peaks vs the potential of the ligand center oxidation for complexes <b>1</b> , <b>4</b> and <b>5</b> .                                                                                                                                                                                                                                                                                                                                                                                                                                                                                                          | S16       |
| <b>Figure S14.</b> <sup>51</sup> V NMR spectra of solutions (DMSO-d <sub>6</sub> ) that contain <b>4</b> (2.27 μmols) and U <sup>VI</sup> O <sub>2</sub> (0-5.5 μmols). With * the peak from inorganic vanadates.                                                                                                                                                                                                                                                                                                                                                                                                                                                 | S17       |
| <b>Figure S15.</b> A) Benesi-Hildebrand plot of U <sup>VO</sup> O <sub>2</sub> <sup>2+</sup> added in a DMSO 9:1 H <sub>2</sub> O solution of H <sub>2</sub> cbht (3.74 x 10 <sup>-5</sup> M) and Et <sub>3</sub> N (14.8 x 10 <sup>-5</sup> M), B) Benesi-Hildebrand plot of VO <sub>4</sub> <sup>3-</sup> added in a DMSO 9:1 H <sub>2</sub> O solution of H <sub>2</sub> cbht (3.74 x 10 <sup>-5</sup> M) and Et <sub>3</sub> N (14.8 x 10 <sup>-5</sup> M), C) Benesi-Hildebrand plot of Fe <sup>3+</sup> added in a DMSO 9:1 H <sub>2</sub> O solution of H <sub>2</sub> cbht (3.74 x 10 <sup>-5</sup> M) and Et <sub>3</sub> N (14.8 x 10 <sup>-5</sup> M). | S18       |
| <b>Table S1:</b> Crystal Data and Structure Refinement for the compounds <b>1 - 3</b> .                                                                                                                                                                                                                                                                                                                                                                                                                                                                                                                                                                           | S19       |
| <b>Table S2:</b> Crystal Data and Structure Refinement for the compounds <b>4</b> and <b>5</b> .                                                                                                                                                                                                                                                                                                                                                                                                                                                                                                                                                                  | S21       |
| <b>Table S3:</b> Interatomic Distances (Å) and Angles (deg) Relevant to the U <sup>VI</sup> , Fe <sup>III</sup> coordination Sphere.                                                                                                                                                                                                                                                                                                                                                                                                                                                                                                                              | S23       |
| <b>Table S4:</b> Interatomic Distances (Å) and Angles (deg) Relevant to the U <sup>VI</sup> , V <sup>V</sup> , coordination Sphere.                                                                                                                                                                                                                                                                                                                                                                                                                                                                                                                               | S24       |
| <b>Scheme S1:</b> Synthesis of the complexes of U <sup>VI</sup> O <sub>2</sub> <sup>2+</sup> with H <sub>2</sub> cbht.                                                                                                                                                                                                                                                                                                                                                                                                                                                                                                                                            | S25       |
| <b>Scheme S2:</b> Synthesis of the complexes of V <sup>VO</sup> O <sub>2</sub> <sup>+</sup> and Fe <sup>III</sup> with H <sub>2</sub> cbht.                                                                                                                                                                                                                                                                                                                                                                                                                                                                                                                       | S25       |

## Supporting Information

**Materials and Methods.** All chemicals and solvents were purchased from Merck. Microanalyses for C, H, and N were performed using a Euro-Vector EA3000 CHN elemental analyzer. FT-IR transmission spectra of the compounds were acquired using a Shimadzu IR Spirit model spectrophotometer. The UV-vis measurements were recorded on a Shimadzu UV-Vis spectrophotometer Model UV-2600i, equipped with a CCD array, operating in the range 200 to 900 nm. Merck silica gel 60 F254 TLC plates were used for thin layer chromatography.

**X-ray Structure Analysis.** X-ray diffraction data of single crystals of the complex compounds were collected on a Rigaku XtaLAB Synergy S diffractometer, equipped with a HyPix-6000HE detector utilizing enhanced Cu Ka ( $\lambda = 1.5406 \text{ \AA}$ ) X-ray source and graphite radiation monochromator. CrysAlis CCD and CrysAlis RED software were used for data collection and data reduction/cell refinement respectively. Analytical absorption correction was applied using CrysAlis RED software. The structure of the compounds was solved by direct methods and refined by full matrix least squares techniques on F2 by using SHELXT. Special computing molecular graphics incorporated in the OLEX 2.0 interface were used. All the non-H atoms were anisotropically refined. The positions of hydrogen atoms in all structures were calculated from stereochemical considerations and kept fixed isotropic during refinement or found in DF map and refined with isotropic thermal parameters. ORTEP software was used for molecular graphics. Selected crystal data for **1-5** are summarized in tables S3, S4 respectively.

**NMR Spectroscopy.** NMR measurements. All NMR samples were prepared by dissolving each compound in deuteriated solvents at room temperature just prior to NMR spectrometric determinations. NMR spectra were recorded on a Bruker Avance III 500 MHz spectrometer. A 30°-pulse width was applied for both the  $^1\text{H}$  (SW= 10331 Hz) and  $^{13}\text{C}$  NMR (SW= 29762 Hz) measurements, and 2s relaxation delay. A 90°-pulse width and 0.001s relaxation delay were applied for  $^{51}\text{V}$  NMR (SW= 50000 Hz) measurements. For 2D  $\{^1\text{H}\}$  EXSY NMR, the size of the FID was 2K x 256 for F1 (SW= 1150 Hz) and at F2 (SW= 1150) axes respectively while mixing time was set to 0.5s and relaxation delay to 4s. For  $\{^1\text{H}\}$  COSY NMR, size of the FID was 6K x 128 for F1 (SW= 1202 Hz) and at F2 (SW= 1202) axes respectively. For 2D  $\{^1\text{H}, ^{13}\text{C}\}$  grHSQC NMR, the size of the FID was 1K x 256 for F1 (SW= 27665 Hz) and F2 (SW= 8013 Hz). Data acquisition and processing were accomplished using TopSpin 4.0.6 and MultiSpecNMR 4.0.0 (<https://sourceforge.net/projects/multispecnmr/>). Standard pulse programs as implemented in TopSpin were used for data acquisition.

**Sample Preparation for  $^1\text{H}$  &  $^{51}\text{V}$  NMR measurements.** For the NMR titration of **4** with variable  $\text{U}^{\text{VI}}\text{O}_2^{2+}$  concentrations, the samples were prepared as follows: *dms**o*- $\text{d}_6$  solution at standard ligand concentration (2.27  $\mu\text{mol}$ s) was prepared by dissolving 0.0011 g of complex **1** in 0.62 mL of *dms**o*- $\text{d}_6$ . To this solution, were added 10-110  $\mu\text{L}$  (0.5-5.5  $\mu\text{mol}$ s) portions of a  $[\text{U}^{\text{VI}}\text{O}_2(\text{NO}_3)_2(\text{H}_2\text{O})_2]\cdot 4\text{H}_2\text{O}$  solution in *dms**o*- $\text{d}_6$  (0.05 M). The solution was stirred at room temperature for 10 minutes prior to each measurement to assure chemical equilibrium.

**Fluorescence studies.** All fluorescence measurements were performed on a JASCO FP-8300 instrument using Quartz cells. Parameters used: Excitation and Emission bandwidths were set at 5nm. Response time was at 20 msec the sensitivity of the measurement was set to high and the Number of scans (NS) was one. Blank correction was applied prior to the measurement. The solutions for the fluorescence quenching experiments were prepared by adding 5  $\mu\text{L}$  fractions of the appropriate metal

solution (200  $\mu\text{M}$ ) to the ligand solution (10  $\mu\text{M}$  ligand and 40  $\mu\text{M}$  of triethylamine). The final volume of solutions was 1.300 mL. The solvent for all solutions mentioned was a mixture of DMSO 9:1  $\text{H}_2\text{O}$ .  
a) NS

### **Electrochemistry**

Cyclic voltammetry (CV) and Square Wave Voltammetry (SWV) experiments were recorded using an CH Instruments Electrochemical Workstation model CHI650E potentiostat/galvanostat. Electrochemical procedures were performed with a three-electrode configuration: Glassy carbon was used as the working electrode, a platinum wire as the auxiliary electrode, and Ag/AgCl (0.20 V vs NHE) as reference. The potential of the reference electrode was measured with ferrocene (0.65 V vs NHE). All the potential values are referred to NHE. The electrochemical measurements were carried out in DMF solutions of  $\text{Bu}_4\text{NClO}_4$  (0.1 M) purged with  $\text{N}_2$  prior to the measurements at 298 K. Scan rate (v) of 100  $\text{mV s}^{-1}$  was used for cyclic voltammograms. For Square Wave Voltammetry experiments, the Increment was 0.004 V, Amplitude was 0.025 V and the frequency was set at 15 Hz.

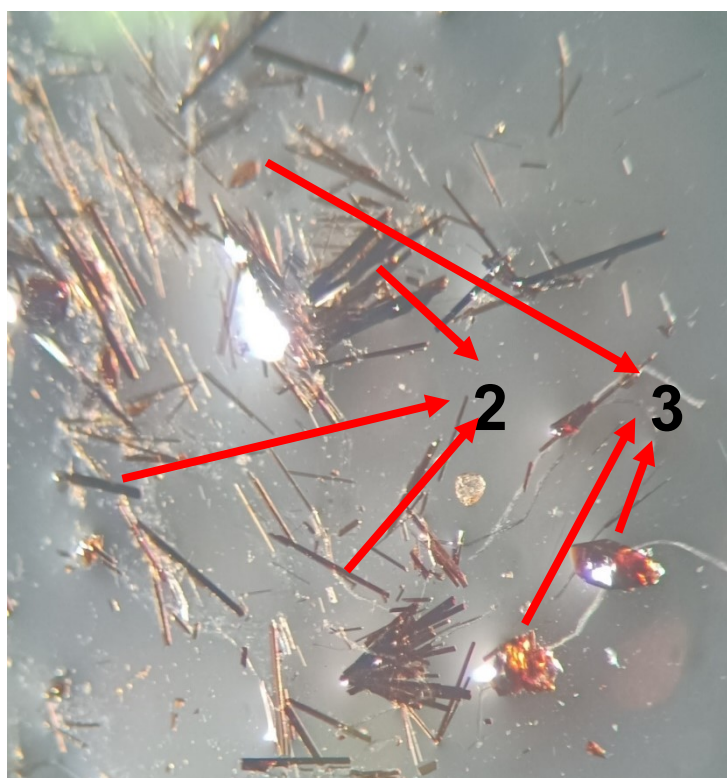

**Figure S1.** Co-crystallization of complexes **2** and **3** under microscope. Complex **2** crystallizes as rod-like crystals while complex **3** as blocks.

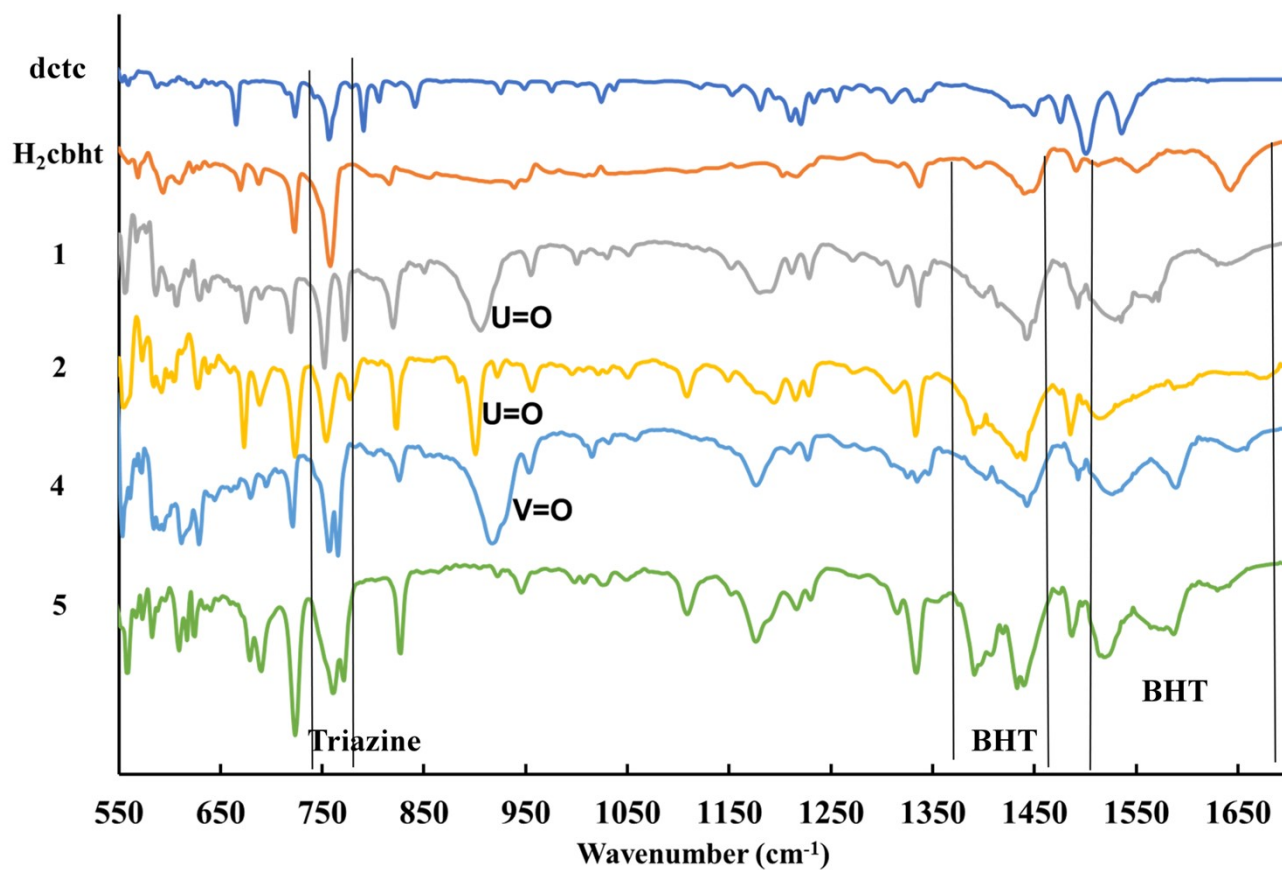

**Figure S2.** Infra red spectra of detc, H<sub>2</sub>cbht and 1, 2, 4 and 5 and assignments.

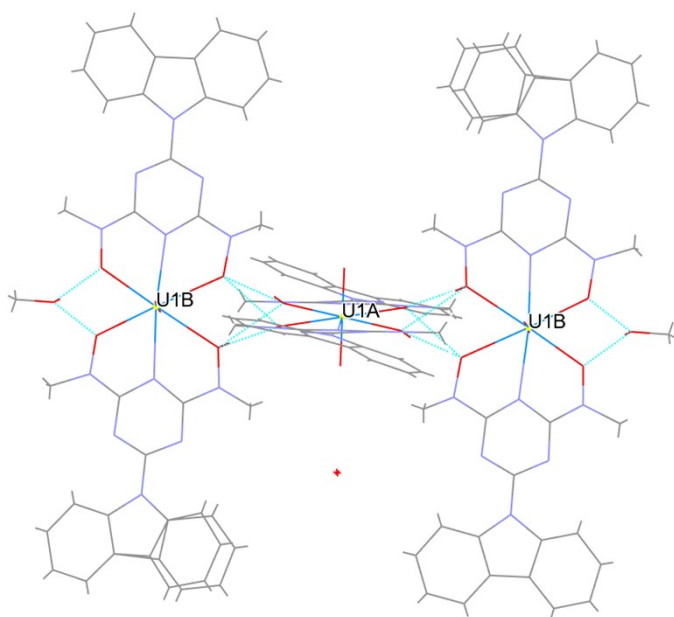

**Figure S3.** Wireframe drawing of the crystal structure of 2.

# NMR

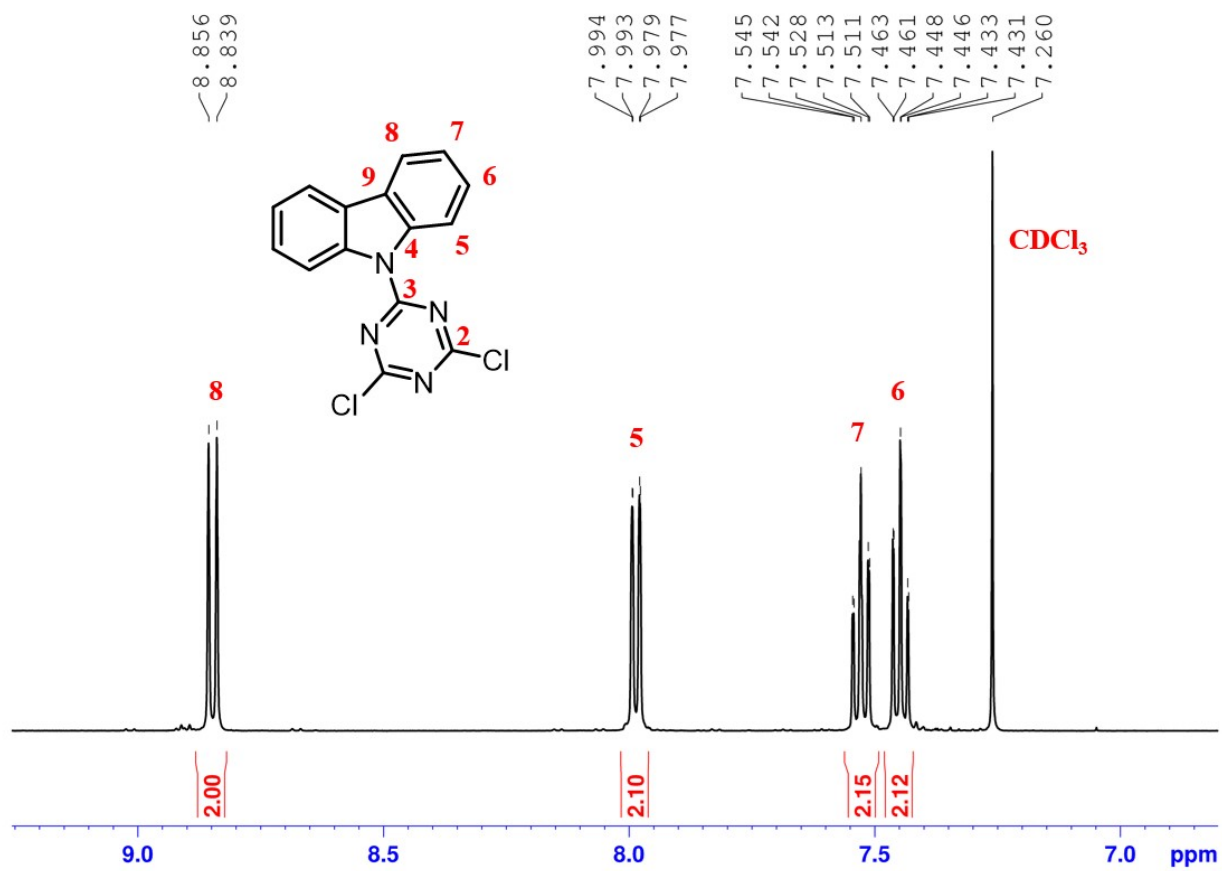

**Figure S4:** <sup>1</sup>H NMR spectrum of dtc in CDCl<sub>3</sub>, 500 MHz, 20°C.

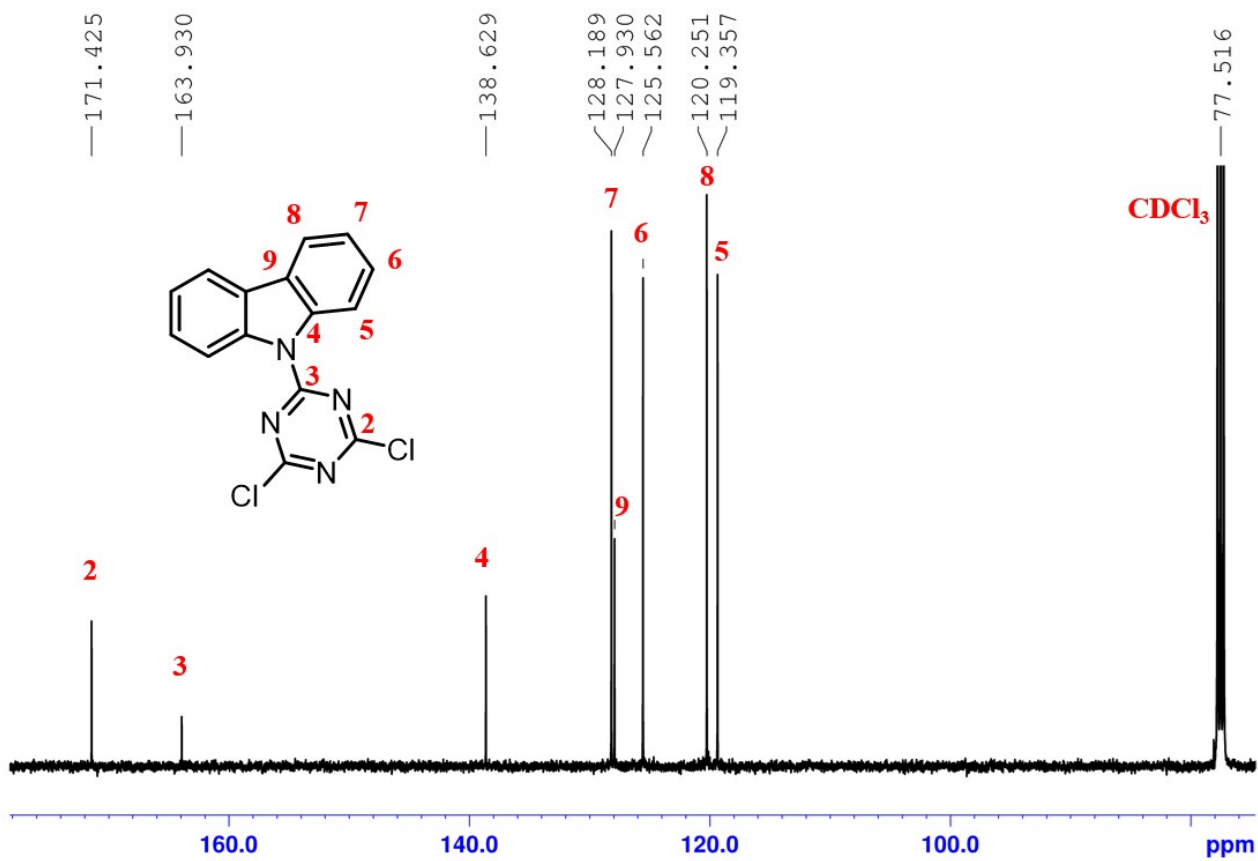

**Figure S5:**  $^{13}\text{C}$  NMR spectrum of dclc in  $\text{CDCl}_3$ , 126 MHz, 20°C.



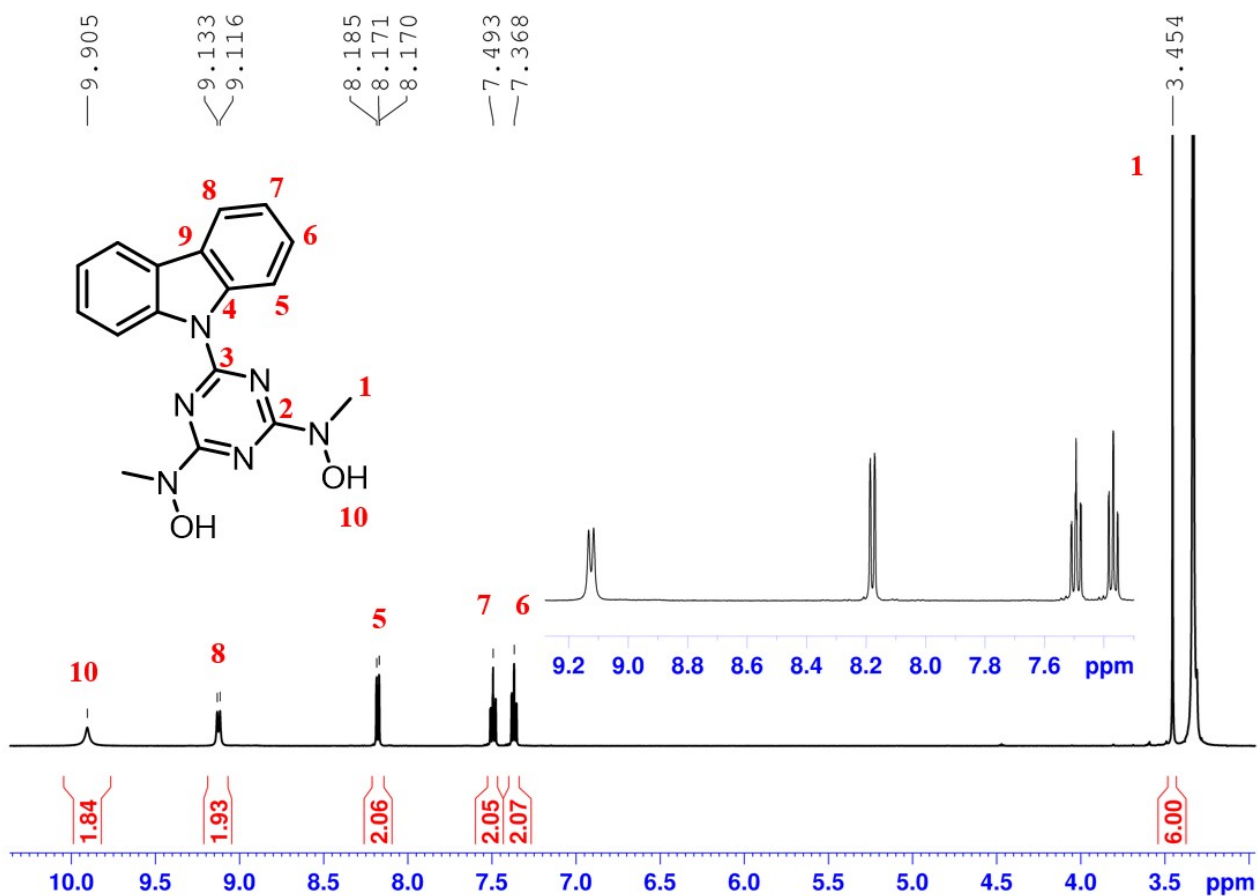

**Figure S6:**  $^1\text{H}$  NMR spectrum of  $\text{H}_2\text{cbht}$  in  $\text{DMSO-d}_6$ , 500 MHz, 20°C.

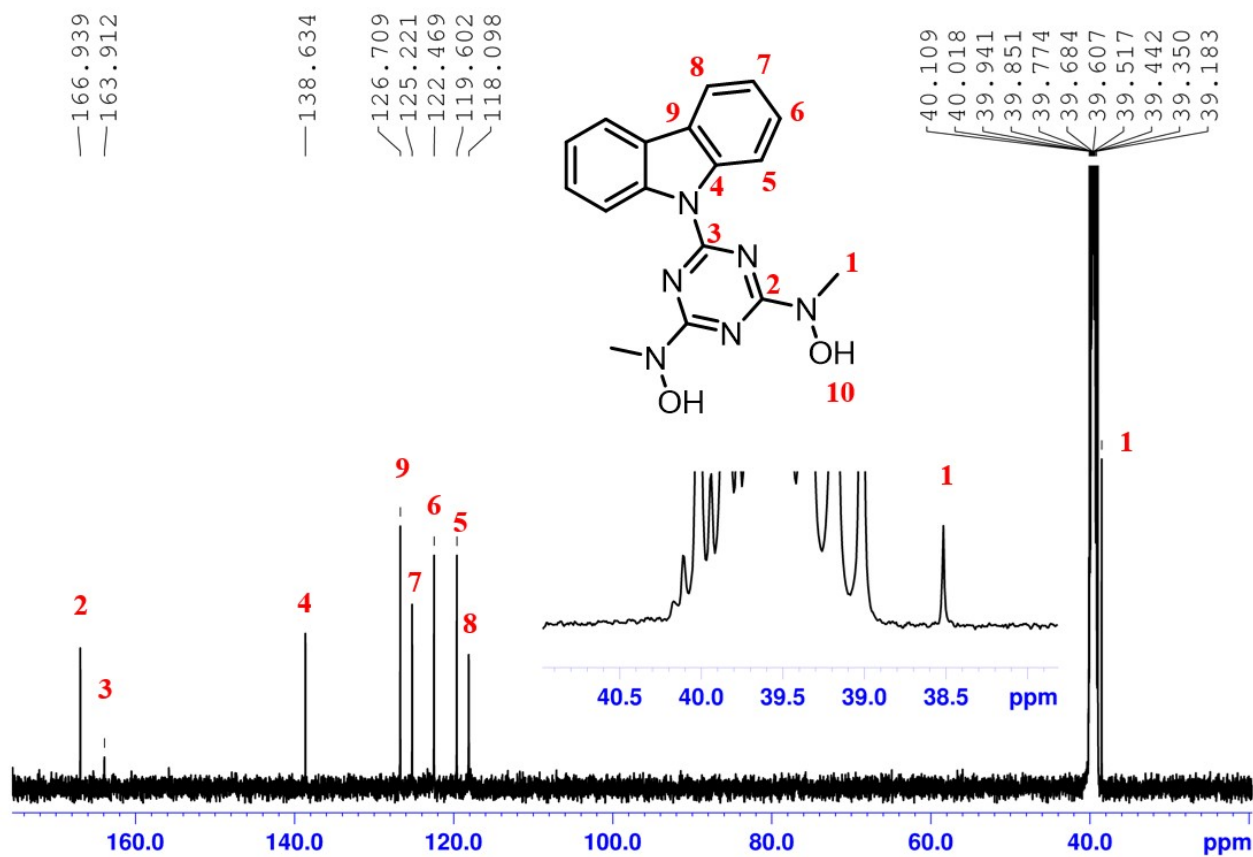

**Figure S7:** <sup>13</sup>C NMR spectrum of H<sub>2</sub>cbht in DMSO-d<sub>6</sub>, 126 MHz, 20°C.

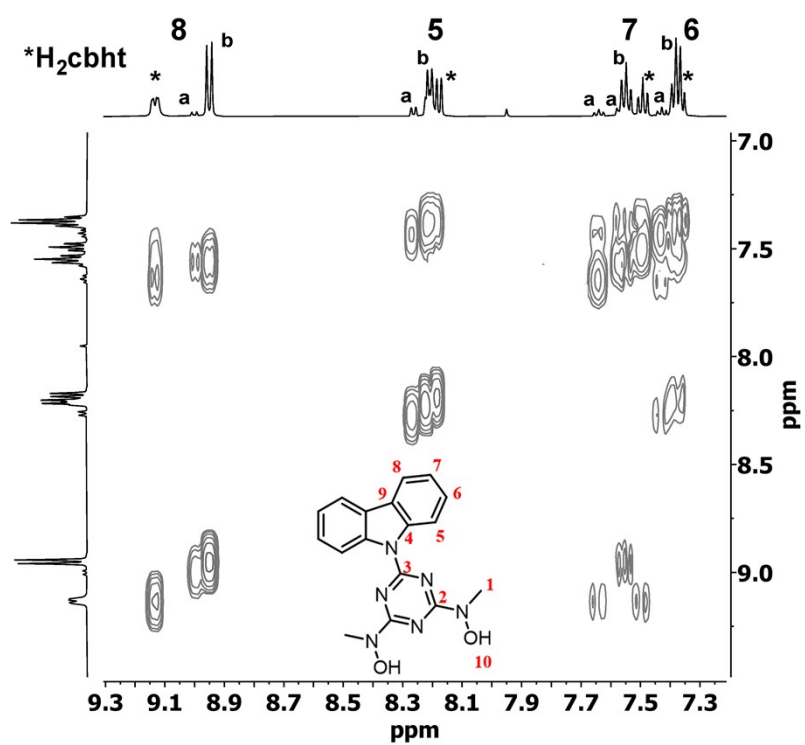

**Figure S8.** 2D  $\{^1\text{H}\}$  grCOSY spectrum of the aromatic region of a  $\text{dmsO-}d_6$  solution of a solution of **1** (x mM),  $\text{H}_2\text{cbht}$  (x mM) and  $\text{Et}_3\text{N}$  (x mM). (a=carbazole protons on  $\text{cbht}^{2-}$  containing  $sp^3$  N atoms, b=carbazole protons on  $\text{cbht}^{2-}$  containing only  $sp^2$  N atoms)

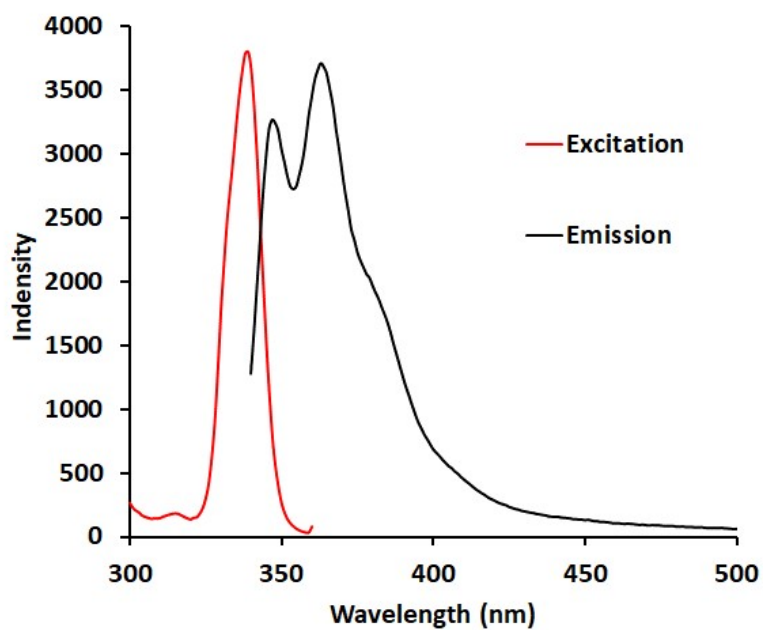

**Figure S9.** Excitation and emission spectrum of 1.00 mM M of H<sub>2</sub>cbht in dmsu.

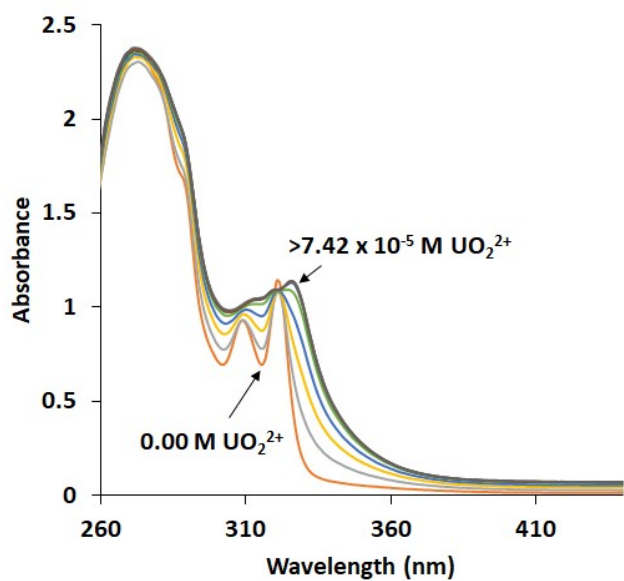

**Figure S10.** UV-vis spectra of  $7.42 \times 10^{-5} \text{ M}$  of  $\text{H}_2\text{cbht}$  and  $27.7 \times 10^{-5} \text{ M}$  of  $\text{Et}_3\text{N}$  in  $\text{dmsO}$  titrated by  $\text{U}^{\text{VI}}\text{O}(\text{NO}_3)_2$  in  $\text{dmsO}$ . In each spectrum,  $\text{U}^{\text{VI}}\text{O}_2^{2+}$  is added in order the concentration of the metal ion to be increased by  $1.58 \times 10^{-5} \text{ M}$ .

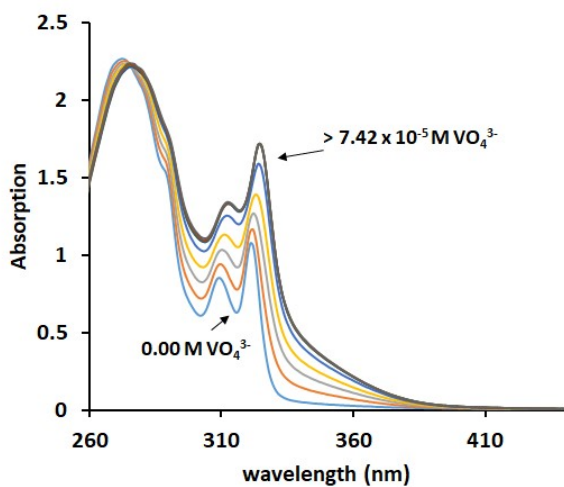

**Figure S11.** UV-vis spectra of  $7.42 \times 10^{-5} \text{ M}$  of  $\text{H}_2\text{cbht}$  and  $27.7 \times 10^{-5} \text{ M}$  of  $\text{Et}_3\text{N}$  in  $\text{dmsol}$  titrated by  $\text{NaVO}_3$  in  $\text{H}_2\text{O}$ . In each spectrum,  $\text{VO}_4^{3-}$  is added in order the concentration of the metal ion to be increased by  $1.58 \times 10^{-5} \text{ M}$ .

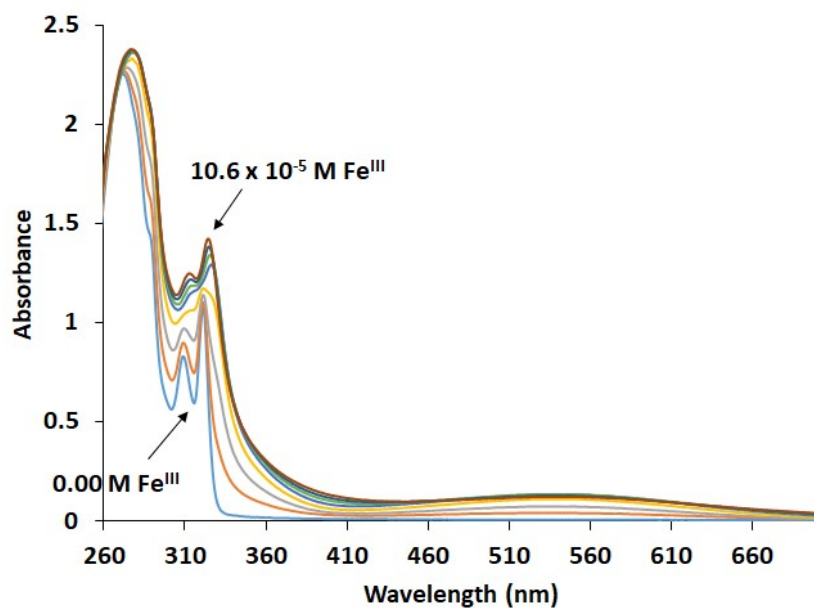

**Figure S12.** UV-vis spectra of  $7.42 \times 10^{-5}$  M of  $\text{H}_2\text{cbht}$  and  $27.7 \times 10^{-5}$  M of  $\text{Et}_3\text{N}$  in  $\text{dmsO}$  titrated by  $\text{Fe}^{\text{III}}(\text{NO}_3)_3$  in  $\text{dmsO}$ . In each spectrum,  $\text{Fe}^{\text{III}}$  is added in order the concentration of the metal ion to be increased by  $1.58 \times 10^{-5}$  M.

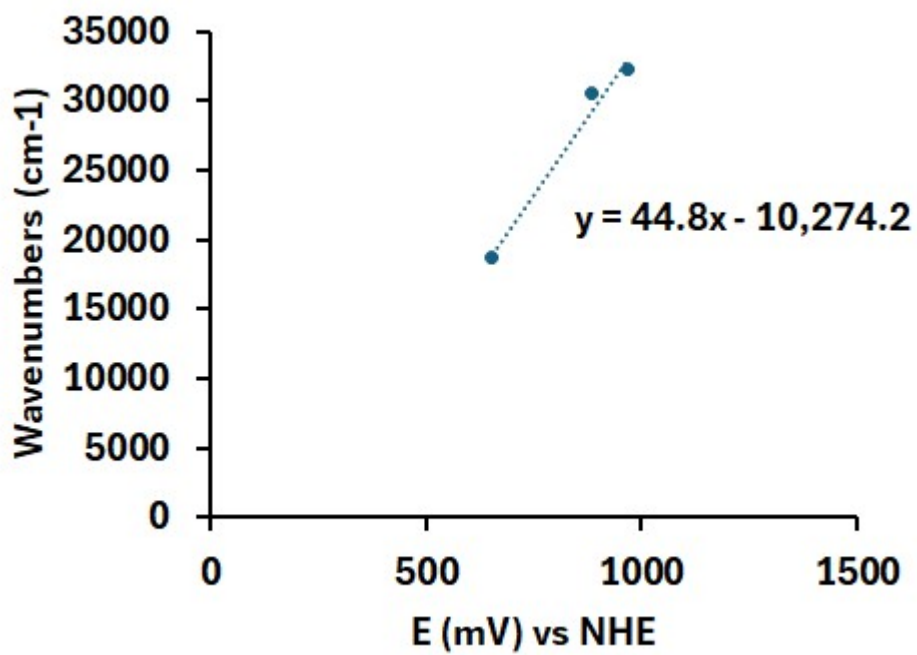

**Figure S13.** Plot of the energy of the LMCT peaks vs the potential of the ligand center oxidation for complexes 1, 4 and 5.



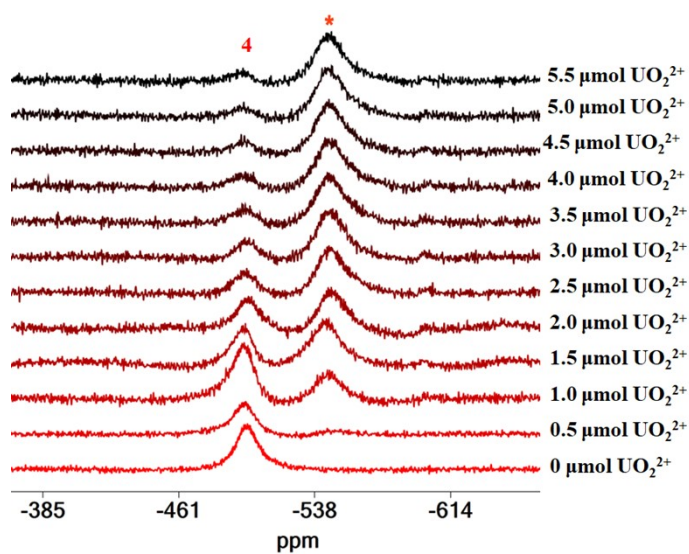

**Figure S14.**  $^{51}\text{V}$  NMR spectra of solutions ( $\text{DMSO-d}_6$ ) that contain **4** (2.27  $\mu\text{mol}$ ) and  $\text{U}^{\text{VI}}\text{O}_2$  (0-5.5  $\mu\text{mol}$ ). With \* the peak from inorganic vanadates.

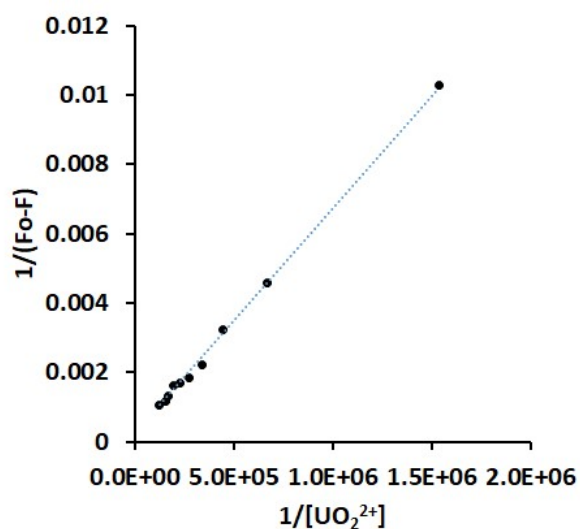

A)

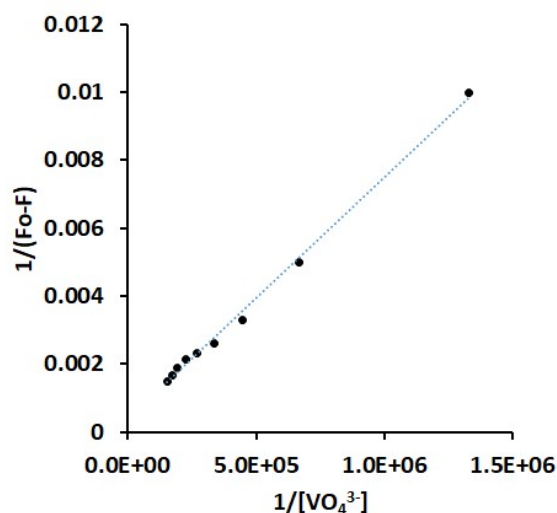

B)

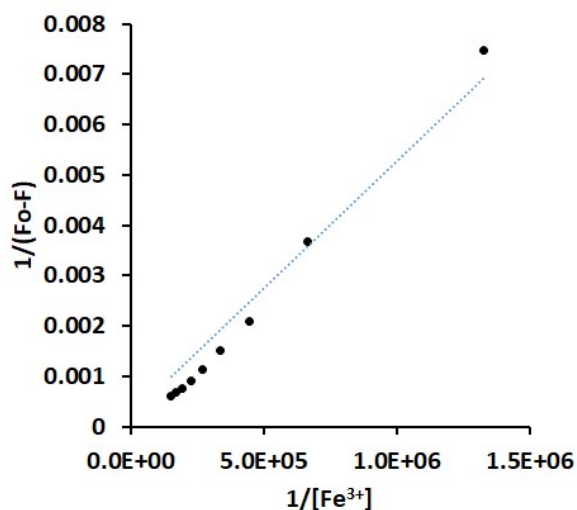

C)

**Figure S15.** A) Benesi-Hildebrand plot of  $UVO_2^{2+}$  added in a DMSO 9:1  $H_2O$  solution of  $H_2cbht$  ( $3.74 \times 10^{-5}$  M) and  $Et_3N$  ( $14.8 \times 10^{-5}$  M), B) Benesi-Hildebrand plot of  $VO_4^{3-}$  added in a DMSO 9:1  $H_2O$  solution of  $H_2cbht$  ( $3.74 \times 10^{-5}$  M) and  $Et_3N$  ( $14.8 \times 10^{-5}$  M), C) Benesi-Hildebrand plot of  $Fe^{3+}$  added in a DMSO 9:1  $H_2O$  solution of  $H_2cbht$  ( $3.74 \times 10^{-5}$  M) and  $Et_3N$  ( $14.8 \times 10^{-5}$  M).

**Table S1:** Crystal Data and Structure Refinement for the compounds 1 and 2.

| Parameter                                   | 1                                                               | 2                                                                                            | 3                                                                                               |
|---------------------------------------------|-----------------------------------------------------------------|----------------------------------------------------------------------------------------------|-------------------------------------------------------------------------------------------------|
| Empirical formula                           | C <sub>21</sub> H <sub>25</sub> N <sub>7</sub> O <sub>6</sub> U | C <sub>80</sub> H <sub>79.50</sub> N <sub>18</sub> O <sub>11.75</sub> P<br>U <sub>1.50</sub> | C <sub>122</sub> H <sub>110</sub> N <sub>26</sub> O <sub>16</sub> P <sub>2</sub> U <sub>3</sub> |
| Formula weight                              | 709.51                                                          | 1869.13                                                                                      | 2972.38                                                                                         |
| Temperature/K                               | 293(2)                                                          | 150(2) K                                                                                     | 150.0(1)                                                                                        |
| Crystal system                              | triclinic                                                       | Monoclinic                                                                                   | triclinic                                                                                       |
| Space group                                 | P-1                                                             | P 21/n                                                                                       | P-1                                                                                             |
| a/Å                                         | 10.39940(10)                                                    | 24.7499(9)                                                                                   | 13.5096(2)                                                                                      |
| b/Å                                         | 10.40700(10)                                                    | 34.5643(3)                                                                                   | 13.6013(2)                                                                                      |
| c/Å                                         | 11.93030(10)                                                    | 13.4753(5)                                                                                   | 17.1971(2)                                                                                      |
| $\alpha$ /°                                 | 109.3150(10)                                                    | 90                                                                                           | 99.7750(10)                                                                                     |
| $\beta$ /°                                  | 93.6850(10)                                                     | 136.637(7)                                                                                   | 103.0330(10)                                                                                    |
| $\gamma$ /°                                 | 94.3070(10)                                                     | 90                                                                                           | 106.2090(10)                                                                                    |
| Volume/Å <sup>3</sup>                       | 1209.60(2)                                                      | 7915.1(8)                                                                                    | 2863.23(7)                                                                                      |
| Z                                           | 2                                                               | 4                                                                                            | 1                                                                                               |
| $\rho_{\text{calc}}$ /cm <sup>3</sup>       | 1.948                                                           | 1.569                                                                                        | 1.724                                                                                           |
| $\mu$ /mm <sup>-1</sup>                     | 19.335                                                          | 9.390                                                                                        | 12.719                                                                                          |
| F(000)                                      | 680.0                                                           | 3730                                                                                         | 1458.0                                                                                          |
| Crystal size/mm <sup>3</sup>                | 0.23 × 0.12 × 0.04                                              | 0.087 x 0.061 x 0.042                                                                        | 0.08 × 0.05 × 0.05                                                                              |
| Radiation                                   | Cu K $\alpha$ ( $\lambda$ = 1.54184)                            | Cu K $\alpha$ ( $\lambda$ = 1.54184)                                                         | Cu K $\alpha$ ( $\lambda$ = 1.54184)                                                            |
| 2 $\Theta$ range for data collection/°      | 7.888 to 153.61                                                 | 2.898 to 77.431                                                                              | 5.446 to 154.51                                                                                 |
| Index ranges                                | -12 ≤ h ≤ 12, -13 ≤ k ≤ 13, -14 ≤ l ≤ 15                        | -31 ≤ h ≤ 31, -43 ≤ k ≤ 16, -17 ≤ l ≤ 16                                                     | -17 ≤ h ≤ 16, -16 ≤ k ≤ 14, -21 ≤ l ≤ 21                                                        |
| Reflections collected                       | 43635                                                           | 56751                                                                                        | 37937                                                                                           |
| Independent reflections                     | 4883 [R <sub>int</sub> = 0.0460, R <sub>sigma</sub> = 0.0185]   | 16196 [R(int) = 0.0444]                                                                      | 11683 [R <sub>int</sub> = 0.0404, R <sub>sigma</sub> = 0.0392]                                  |
| Data/restraints/parameters                  | 4883/0/322                                                      | 16196 / 4 / 1055                                                                             | 11683/0/797                                                                                     |
| Goodness-of-fit on F <sup>2</sup>           | 1.111                                                           | 1.037                                                                                        | 1.057                                                                                           |
| Final R indexes [I ≥ 2 $\sigma$ (I)]        | R <sub>1</sub> = 0.0161, wR <sub>2</sub> = 0.0406               | R <sub>1</sub> = 0.0308, wR <sub>2</sub> = 0.0780                                            | R <sub>1</sub> = 0.0315, wR <sub>2</sub> = 0.0751                                               |
| Final R indexes [all data]                  | R <sub>1</sub> = 0.0162, wR <sub>2</sub> = 0.0407               | R <sub>1</sub> = 0.0368, wR <sub>2</sub> = 0.0805                                            | R <sub>1</sub> = 0.0349, wR <sub>2</sub> = 0.0767                                               |
| Largest diff. peak/hole / e Å <sup>-3</sup> | 0.53/-0.95                                                      | 1.202/-1.779                                                                                 | 2.12/-1.81                                                                                      |

<sup>a</sup>  $R1 = \frac{\sum |F_o| - |F_c|}{\sum |F_o|}$ . <sup>b</sup>  $wR2 = \left\{ \frac{\sum [w(F_o^2 - F_c^2)^2]}{\sum [w(F_o^2)_2]} \right\}^{1/2}$ , where  $w = 1/[\sigma^2(F_o^2) + (aP)^2 + bP]$ ,  $P = (F_o^2 + 2F_c^2)/3$ . <sup>c</sup>  $GoF = \left\{ \frac{\sum [w(F_o^2 - F_c^2)_2]}{(n-p)} \right\}^{1/2}$ , where  $n$  = number of reflections and  $p$  is the total number of parameters refined.

**Table S2:** Crystal Data and Structure Refinement for the compounds **3** and **4**.

| Parameter                                   | <b>4</b>                                                          | <b>5</b>                                                            |
|---------------------------------------------|-------------------------------------------------------------------|---------------------------------------------------------------------|
| Empirical formula                           | C <sub>17</sub> H <sub>20</sub> N <sub>6</sub> NaO <sub>7</sub> V | C <sub>58</sub> H <sub>63</sub> FeN <sub>12</sub> O <sub>13</sub> P |
| Formula weight                              | 494.32                                                            | 1223.02                                                             |
| Temperature/K                               | 149.96(10)                                                        | 155.0(2)                                                            |
| Crystal system                              | triclinic                                                         | triclinic                                                           |
| Space group                                 | P-1                                                               | P-1                                                                 |
| a/Å                                         | 7.03000(10)                                                       | 14.2496(7)                                                          |
| b/Å                                         | 10.52220(10)                                                      | 15.3470(7)                                                          |
| c/Å                                         | 14.68810(10)                                                      | 16.5555(5)                                                          |
| α/°                                         | 79.5520(10)                                                       | 101.555(3)                                                          |
| β/°                                         | 81.2120(10)                                                       | 108.396(4)                                                          |
| γ/°                                         | 71.4500(10)                                                       | 113.274(4)                                                          |
| Volume/Å <sup>3</sup>                       | 1007.69(2)                                                        | 2928.4(2)                                                           |
| Z                                           | 2                                                                 | 2                                                                   |
| ρ <sub>calc</sub> /cm <sup>3</sup>          | 1.626                                                             | 1.387                                                               |
| μ/mm <sup>-1</sup>                          | 4.832                                                             | 2.948                                                               |
| F(000)                                      | 508.0                                                             | 1280.0                                                              |
| Crystal size/mm <sup>3</sup>                | 0.235 × 0.114 × 0.075                                             | 0.105 × 0.058 × 0.025                                               |
| Radiation                                   | CuKα (λ = 1.54184)                                                | Cu Kα (λ = 1.54184)                                                 |
| 2θ range for data collection/°              | 6.15 to 153.436                                                   | 6.064 to 153.28                                                     |
| Index ranges                                | -8 ≤ h ≤ 8, -12 ≤ k ≤ 13, -17 ≤ l ≤ 18                            | -17 ≤ h ≤ 17, -19 ≤ k ≤ 19, -20 ≤ l ≤ 18                            |
| Reflections collected                       | 37003                                                             | 37055                                                               |
| Independent reflections                     | 4044 [R <sub>int</sub> = 0.0331, R <sub>sigma</sub> = 0.0137]     | 11912 [R <sub>int</sub> = 0.0815, R <sub>sigma</sub> = 0.0825]      |
| Data/restraints/parameters                  | 4044/0/298                                                        | 11912/2/797                                                         |
| Goodness-of-fit on F <sup>2</sup>           | 1.079                                                             | 1.027                                                               |
| Final R indexes [I ≥ 2σ (I)]                | R <sub>1</sub> = 0.0286, wR <sub>2</sub> = 0.0812                 | R <sub>1</sub> = 0.0693, wR <sub>2</sub> = 0.1722                   |
| Final R indexes [all data]                  | R <sub>1</sub> = 0.0288, wR <sub>2</sub> = 0.0814                 | R <sub>1</sub> = 0.1174, wR <sub>2</sub> = 0.2028                   |
| Largest diff. peak/hole / e Å <sup>-3</sup> | 0.511/-0.456                                                      | 0.95/-0.78                                                          |

<sup>a</sup>  $R_1 = \frac{\sum ||F_o| - |F_c||}{\sum |F_o|}$ . <sup>b</sup>  $wR_2 = \frac{\{\sum [w(F_o^2 - F_c^2)^2] / \sum [w(F_o^2)_2]\}^{1/2}}$ , where  $w = 1/[\sigma^2(F_o^2) + (aP)^2 + bP]$ ,  $P = (F_o^2 + 2F_c^2)/3$ . <sup>c</sup>  $GoF = \{\sum [w(F_o^2 - F_c^2)_2] / (n-p)\}^{1/2}$ , where  $n$  = number of reflections and  $p$  is the total number of parameters refined.



**Table S3:** Interatomic Distances (Å) and Angles (deg) Relevant to the U<sup>VI</sup>, Fe<sup>III</sup> coordination Sphere.

| Parameter | 2              |                |           | 5          |            |
|-----------|----------------|----------------|-----------|------------|------------|
|           | U <sub>A</sub> | U <sub>B</sub> |           | Hcbht      | Hcbht'     |
|           |                | Hcbht          | Hcbht'    |            |            |
| M-O1      | 1.782(3)       | 1.780(3)       |           | 2.029(3)   | 2.043(3)   |
| M-O2      | 1.782(3)       | 1.782(3)       |           | 2.119(3)   | 2.114(3)   |
| M-O3      | 2.476(3)       | 2.356(3)       | 2.621(3)  | -          | -          |
| M-O4      | 2.480(3)       | 2.584(3)       | 2.324(3)  | -          | -          |
| M-N3      | 2.531(4)       | 2.551(3)       | 2.551(3)  | 1.980(3)   | 1.997(4)   |
| O1-M-O3   | 88.56(13)      | 92.43(13)      | 90.23(11) | -          | -          |
| O1-M-O4   | 86.63(11)      | 87.03(11)      | 92.72(12) | -          | -          |
| O1-M-N3   | 94.11(12)      | 90.61(12)      | 89.50(12) | 75.54(12)  | 75.19(13)  |
| O2-M-O3   | 91.39(11)      | 91.61(12)      | 85.66(11) |            |            |
| O2-M-O4   | 86.63(11)      | 88.83(11)      | 91.33(12) | -          | -          |
| O2-M-N3   | 94.11(12)      | 89.14(12)      | 90.24(12) | 73.52(11)  | 73.68(12)  |
| O2-M-O1   | 180.0          | 175.30(12)     |           | 148.24(12) | 148.58(11) |
| O3-M-O4   | 120.41(8)      | 120.65(9)      | 120.48(9) | -          | -          |
| N3-M-O3   | 60.70(9)       | 62.08(10)      | 57.88(9)  | -          | -          |
| N3-M-O4   | 60.50(9)       | 58.59(9)       | 62.72(10) | -          | -          |

**Table S4:** Interatomic Distances (Å) and Angles (deg) Relevant to the U<sup>VI</sup>, V<sup>V</sup>, coordination Sphere.

| Parameter | 1         | 4          |
|-----------|-----------|------------|
| M-O1      | 1.780(2)  | 1.6318(12) |
| M-O2      | 1.776(2)  | 1.6313(13) |
| M-O3      | 2.415(0)  | 2.0140(11) |
| M-O4      | 2.299(2)  | 1.9706(12) |
| M-O5      | 2.400(2)  | -          |
| M-O6      | 2.381(2)  | -          |
| M-N3      | 2.433(2)  | 1.9839(13) |
| O1-M-O3   | 87.28(8)  | 98.74(6)   |
| O1-M-O6   | 87.43(9)  | -          |
| O1-M-O4   | 91.85(9)  | 101.15(6)  |
| O1-M-O5   | 89.21(9)  | -          |
| O1-M-N3   | 90.80(9)  | 122.16(7)  |
| O2-M-O3   | 91.08(8)  | 97.30(6)   |
| O2-M-O6   | 88.25(9)  | -          |
| O2-M-O4   | 92.38(9)  | 98.96(6)   |
| O2-M-O5   | 90.80(9)  | -          |
| O2-M-N3   | 92.07(9)  | 128.96(7)  |
| O2-M-O1   | 175.63(9) | 108.83(8)  |
| O3-M-O4   | 126.76(7) | 148.59(5)  |
| N3-M-O3   | 63.15(7)  | 74.29(5)   |
| N3-M-O6   | 139.55(7) | -          |
| N3-M-O4   | 63.64(7)  | 74.57(5)   |
| N3-M-O5   | 138.73(8) | -          |

  

| Parameter | 3              |                          |
|-----------|----------------|--------------------------|
|           | U <sub>1</sub> | U <sub>2</sub>           |
| U-O1      | 1.777(3)       | 1.781(3) <sup>a</sup>    |
| U-O2      | 1.793(3)       | 1.781(3) <sup>a</sup>    |
| U-O3      | 2.309(3)       | -                        |
| U-O4      | 2.319(3)       | -                        |
| U-O3'     | 2.438(3)       | 2.466(3)                 |
| U-O4'     | 2.454(3)       | 2.503(3)                 |
| U-N3      | 2.430(4)       | 2.530(3) <sup>c</sup>    |
| O1-U-O3   | 90.33(15)      | 91.15(12) <sup>a,b</sup> |
| O1-U-O4   | 88.65(15)      | 86.21(12) <sup>a,b</sup> |
| O1-U-N3   | 84.59(14)      | 87.83(13) <sup>a,c</sup> |
| O2-U-O3   | 89.84(14)      | 88.85(12) <sup>a,b</sup> |
| O2-U-O4   | 90.95(14)      | 93.79(12) <sup>a,b</sup> |
| O2-U-N3   | 95.15(14)      | 92.17(13) <sup>a,c</sup> |
| O2-U-O1   | 179.59(16)     | 180.00(19) <sup>a</sup>  |
| O3-U-O4   | 126.96(12)     | 121.06(9) <sup>b</sup>   |
| N3-U-O3   | 63.39(12)      | 60.77(10) <sup>b,c</sup> |
| N3-U-O4   | 63.73(12)      | 60.52(10) <sup>b,c</sup> |
| U1-O3'-U2 | 109.87(11)     |                          |
| U1-O4'-U2 | 108.14(10)     |                          |

**a** For Complex 3, atom U2, O1 & O2 on table are the O5 atom from crystal structure. **b** For Complex 3 and angles around U2 atom, O3 & O4 from table are referred to O3' & O4' from crystal structure respectively. **c** For Complex 3, atom U2, atom N3 on table is atom N3' from crystal structure.



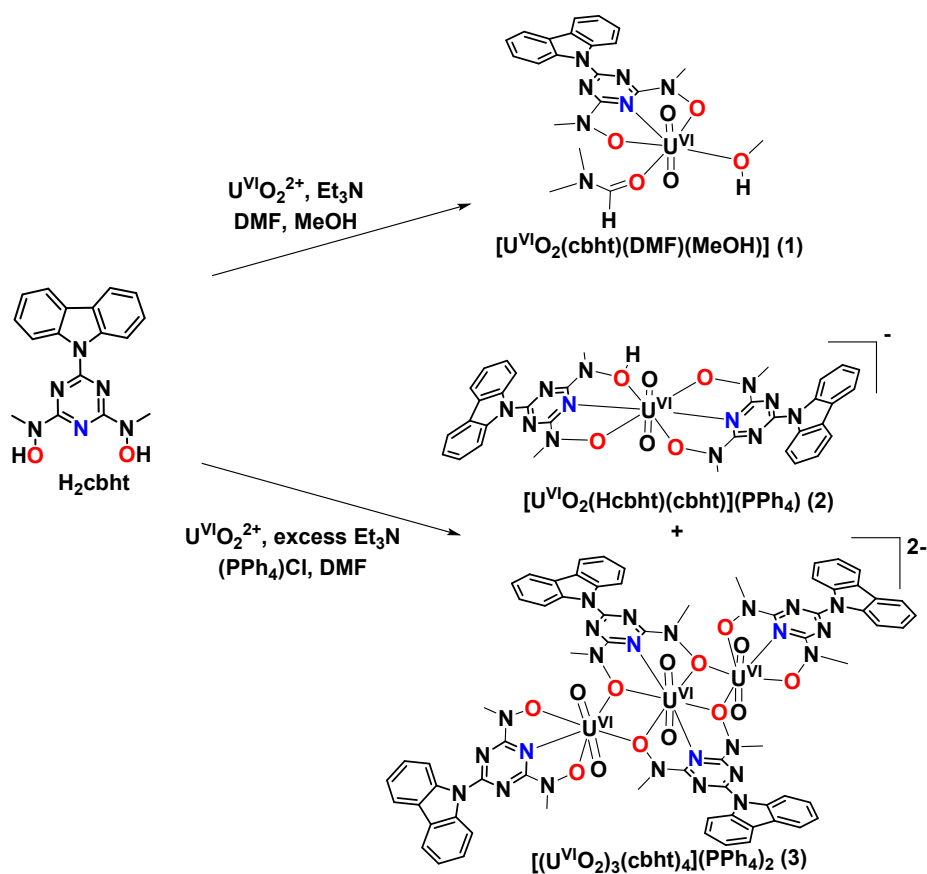

**Scheme S1** Synthesis of the complexes of  $\text{U}^{\text{VI}}\text{O}_2^{2+}$  with  $\text{H}_2\text{cbht}$ .

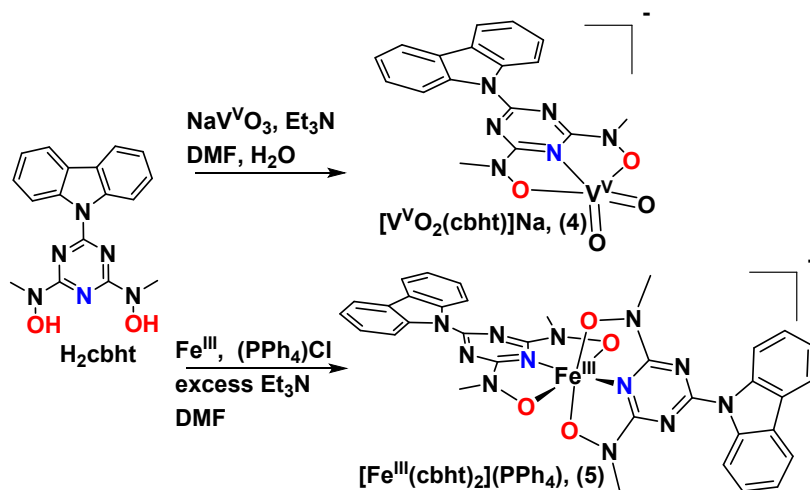

**Scheme S2** Synthesis of the complexes of  $\text{V}^{\text{V}}\text{O}_2^+$  and  $\text{Fe}^{\text{III}}$  with  $\text{H}_2\text{cbht}$ .
